1 **TITLE PAGE**

2 **Title:** THE ORIGIN OF A NEW HUMAN VIRUS: PHYLOGENETIC ANALYSIS OF THE  
3 EVOLUTION OF SARS-COV-2

4

5 **RUNNING TITLE:** Phylogenetic analysis and evolution of SARS-CoV-2

6

7 **Authors:**

8 Matías J. PERESON<sup>a,b</sup>, Laura MOJSIEJCZUK<sup>a,b</sup>, Alfredo P. MARTÍNEZ<sup>c</sup>, Diego M.  
9 FLICHMAN<sup>b,c</sup>, Gabriel H. GARCIA<sup>a</sup>, Federico A. DI LELLO<sup>a,b</sup>

10

11 **Affiliations:**

12 <sup>a</sup>Universidad de Buenos Aires. Facultad de Farmacia y Bioquímica. Instituto de  
13 Investigaciones en Bacteriología y Virología Molecular (IBaViM). Buenos Aires, Argentina.

14 <sup>b</sup>Consejo Nacional de Investigaciones Científicas y Técnicas (CONICET), Ciudad Autónoma  
15 de Buenos Aires, Argentina.

16 <sup>c</sup>Virology Section, Centro de Educación Médica e Investigaciones Clínicas Norberto Quirno  
17 "CEMIC". Buenos Aires, Argentina.

18 <sup>d</sup>Instituto de Investigaciones Biomédicas en Retrovirus y Síndrome de Inmunodeficiencia  
19 Adquirida (INBIRS) – Consejo Nacional de Investigaciones Científicas y Técnicas  
20 (CONICET), Universidad de Buenos Aires, Buenos Aires, Argentina.

21

22 **Disclosures:** None

23

24 **Corresponding author:**

25 Dr. Federico Alejandro Di Lello, Facultad de Farmacia y Bioquímica, Universidad de Buenos  
26 Aires, Instituto de Investigaciones en Bacteriología y Virología Molecular (IBaViM). Junín 956,  
27 4º piso, (1113), Ciudad Autónoma de Buenos Aires, Argentina.  
28 Phone: +54 11 5287 4472, Fax: +54 11 5287 4662, E-mail: [fadilello@ffyb.uba.ar](mailto:fadilello@ffyb.uba.ar)

29

### 30 **Author contributions**

31

32 MJP: Data curation, acquisition of data, analysis and interpretation of data, drafting the article,  
33 final approval of the version to be submitted.

34

35 LM: Data curation, acquisition of data, analysis and interpretation of data, revising the article  
36 critically for important intellectual content, final approval of the version to be submitted.

37

38 APM: Data curation, Validation, revising the article critically for important intellectual content,  
39 final approval of the version to be submitted.

40

41 DMF: Data curation, Validation, drafting the article, final approval of the version to be  
42 submitted.

43

44 GG: Data curation, acquisition of data, analysis and interpretation of data, drafting the article,  
45 final approval of the version to be submitted.

46

47 FAD: Conception and design of the study, acquisition of data, analysis and interpretation of  
48 data, drafting the article, final approval of the version to be submitted.

49

50

51

52

53

54

55 **ABSTRACT**

56 *Objectives:* During the first months of SARS-CoV-2 evolution in a new host, contrasting  
57 hypotheses have been proposed about the way the virus has evolved and diversified  
58 worldwide. The aim of this study was to perform a comprehensive evolutionary analysis to  
59 describe the human outbreak and the evolutionary rate of different genomic regions of SARS-  
60 CoV-2.

61 *Methods:* The molecular evolution in nine genomic regions of SARS-CoV-2 was analyzed  
62 using three different approaches: phylogenetic signal assessment, emergence of amino acid  
63 substitutions, and Bayesian evolutionary rate estimation in eight successive fortnights since  
64 the virus emergence.

65 *Results:* All observed phylogenetic signals were very low and consistent trees were obtained.  
66 However, after four months of evolution, it was possible to identify regions revealing an  
67 incipient viral lineages formation despite the low phylogenetic signal, since fortnight 3. Finally,  
68 the SARS-CoV-2 evolutionary rate for regions nsp3 and S, the ones presenting greater  
69 variability, was estimated to range from 1.37 to  $2.19 \times 10^{-3}$  substitution/site/year.

70 *Conclusions:* In conclusion, results obtained in this work about the variable diversity of crucial  
71 viral regions and the determination of the evolutionary rate are consequently decisive to  
72 understanding essential feature of viral emergence. In turn, findings may allow identifying the  
73 best targets for antiviral treatments and vaccines development.

74

75 **KEYWORDS:** SARS-CoV-2, Phylogeny, Evolution, Evolutionary Rate

76 **1. Introduction**

77 Coronaviruses belong to Coronaviridae family and have a single strand of positive-sense RNA  
78 genome of 26 to 32 kb in length (Su et al. 2016). They have been identified in different avian  
79 hosts (Cavanagh, 2007, Ismail et al. 2003) as well as in various mammals including bats,  
80 mice, dogs, etc. Periodically, new mammalian coronaviruses are identified. In late December  
81 2019, Chinese health authorities identified groups of patients with pneumonia of unknown  
82 cause in Wuhan, Hubei Province, China (Zhu et al. 2020). The pathogen, a new coronavirus  
83 called SARS-CoV-2 (Coronaviridae Study Group of the International Committee on Taxonomy  
84 of Viruses, 2020), was identified by local hospitals using a surveillance mechanism for  
85 "pneumonia of unknown etiology" (Li et al. 2020a, Li et al. 2020b, Zhu et al. 2020). The  
86 pandemic has spread rapidly and, to date, more than 14 million confirmed cases and nearly  
87 600,000 deaths have been reported in just over a six months period (World Health  
88 Organization, 2020). This rapid viral spread raises interesting questions about the way its  
89 evolution is driven during the pandemic. From the SARS-CoV-2 genome, 16 non-structural  
90 proteins (nsp1-16), 4 structural proteins [spike (S), envelope (E), membrane (M) and  
91 nucleoprotein (N)], and other proteins essential to complete the replication cycle are translated  
92 (Cui et al. 2019, Luk et al. 2019). The large amount of information currently available allows  
93 knowing, as never before, the real-time evolution history of a virus since its interspecies jump  
94 (Zhou et al. 2020). Most studies published to date have characterized the viral genome and  
95 evolution by analyzing a small number of sequences (Benvenuto et al. 2020, Cagliani et al.  
96 2020, Phan, 2020) since processing of complete genomes constitutes an enormous demand  
97 of time and resources. Despite this, until now, the viral genomic region providing the most  
98 accurate information to characterize SARS-CoV-2, could not be established. This lack of  
99 information prevent from investigating its molecular evolution and monitoring biological  
100 features affecting the development of antiviral and vaccines. Therefore, the aim of this study

101 was to perform a comprehensive viral evolutionary analysis in order to describe the human  
102 outbreak and the molecular evolution rate of different genomic regions of SARS-CoV-2.

## 103 **2. Materials and Methods**

### 104 *2.1 Datasets*

105 In order to generate a dataset representing different geographic regions and time evolution of  
106 the SARS-CoV-2 pandemic from December 24th 2019 to April 17th 2020, data of all the  
107 complete genome sequences available at GISAID (<https://www.gisaid.org/>) on April 18, 2020  
108 were collected. Data inclusion criteria were: a.- complete genomes, b.- high coverage level,  
109 and c.- human hosts only (no other animals, cell culture, or environmental samples). Complete  
110 genomes were aligned using MAFFT against the Wuhan-Hu-1 reference genome  
111 (NC\_045512.2, EPI\_ISL\_402125). The resulting multiple sequence alignment (dataset 1) was  
112 split in nine datasets corresponding to nine coding regions: a.- four structural proteins  
113 [envelope (E), nucleocapsid (N), spike (S), Orf3a], b.- four nonstructural proteins (nsp1, nsp3,  
114 Orf6, and nsp14), and c.- an unknown function protein (Orf8).

115 More than six thousand SARS-CoV-2 publicly available nucleotide sequences were  
116 downloaded. After data selection according to the inclusion criteria, 1616 SARS-CoV-2  
117 complete genomes were included in dataset 1. Sequences of this dataset 1 came from 55  
118 countries belonging to the five continents as follow: Africa: 39 sequences, Americas: 383  
119 sequences, Asia: 387 sequences, Europe: 686 sequences and Oceania: 121 sequences. After  
120 elimination of sequences with indeterminate or ambiguous positions, the number of analyzed  
121 sequences for each region were: nsp1, 1608; nsp3, 1511; nsp14, 1550; S, 1488; Orf3a, 1600;  
122 E, 1615; Orf6, 1616; Orf8, 1612; and N, 1610. Finally, nucleotide sequences were grouped by  
123 fortnight (FN) according to their collection date. Table 1 summarizes the number of sequences  
124 per fortnight since the beginning of the pandemic up to FN 8. Dataset 2 was created with the  
125 variable sequences of each region analyzed in Dataset 1. Dataset 2 was used for the  
126 phylogenetic signal analysis and the Bayesian coalescent trees construction.

127

128 *2.2 Phylogenetic signal*

129 To determine the phylogenetic signal of each of the nine generated alignments, Likelihood  
130 Mapping analyzes were carried out (Strimmer & von Haeseler, 1997), using the Tree Puzzle  
131 v5.3 program (Schmidt et al. 2002) and the Quartet puzzling algorithm. This algorithm allowed  
132 analyzing the tree topologies that can be completely solved from all possible quartets of the n  
133 alignment sequences using maximum likelihood. An alignment with defined tree values  
134 greater than 70-80% presents strong support from the statistical point of view (Schmidt et al.  
135 2002). Identical sequences were also removed with ElimDupes (Available at  
136 <https://www.hiv.lanl.gov/content/sequence/elimdupesv2/elimdupes.html>) as they increase  
137 computation time and provide no additional information about data phylogeny. The best-fit  
138 evolutionary model to each dataset was selected based on the Bayesian Information Criterion  
139 obtained with the JModelTest v2.1.10 software (Darriba et al. 2012).

140

141 *2.3 Analysis of amino acid substitutions*

142 Entropy-One (Available at  
143 [https://www.hiv.lanl.gov/content/sequence/ENTROPY/entropy\\_one.html](https://www.hiv.lanl.gov/content/sequence/ENTROPY/entropy_one.html)) was used to  
144 determining the frequency of amino acids at each position for the nine genomic regions  
145 analyzed and evaluating their permanence in the eight investigated fortnights.

146

147 *2.4 Bayesian coalescence and phylogenetic analysis*

148 To study the relationship between SARS-CoV-2 sequences, nine regions of the virus genome  
149 were investigated by Bayesian analyses. Phylogenetic trees were constructed using Bayesian  
150 inference with MrBayes v3.2.7a (Ronquist et al. 2012). Each gene was analyzed  
151 independently with the same dataset used for the phylogenetic signal analysis so that non-  
152 identical sequences were included in the analysis. Analyses were run for five million

153 generations and sampled every 5000 generations. Convergence of parameters [effective  
154 sample size (ESS)  $\geq 200$ , with a 10% burn-in] was verified with Tracer v1.7.1 (Rambaut et al.  
155 2018). Phylogenetic trees were visualized with FigTree v1.4.4.

156

### 157 *2.5 Evolutionary rate*

158 The estimation of the nucleotide evolutionary rate was made with the Beast v1.10.4 program  
159 package (Suchard et al. 2018). Analyses were run at the CIPRES Science Gateway server  
160 (Miller et al. 2010). Three hundred and twelve sequences without indeterminations  
161 corresponding to the nsp3 (5835nt) and S (3822nt) genes were randomly selected from  
162 dataset 1. The sequences represent all the fortnights and most of the geographical locations  
163 sampled until April 17. Temporal calibration was performed by date of sampling. The  
164 appropriate evolutionary model was selected as described above for phylogenetic signal  
165 analysis. The TIM model of nucleotide substitution was used for nsp3 and, the HKY model of  
166 nucleotide substitution for S. The analysis was carried out under a relaxed (uncorrelated  
167 lognormal) molecular clock model suggest by Duchene & col. (Duchene et al. 2020) and with  
168 an exponential demographic, proper for early viral samples from an outbreak (Grassly &  
169 Fraser, 2008). Independent runs were performed for each dataset and a Markov chain Monte  
170 Carlo (MCMC) with a length of  $1.3 \times 10^9$  steps, sampling every  $1.3 \times 10^6$  steps, was set. The  
171 convergence of the "meanRate" parameters [effective sample size (ESS)  $\geq 200$ , burn-in 10%]  
172 was verified with Tracer v1.7.1 (Rambaut et al. 2018). Additionally, in order to verify the  
173 obtained results, 15 independent replicates of the analysis were performed with the time  
174 calibration information (date of sampling) randomized as described by Rieux & Khatchikian,  
175 2017 (Rieux & Khatchikian, 2017). Finally, the obtained parameters for real data and the  
176 randomized replicates were compared.

177



178 **3. Results**

179 *3.1 Phylogenetic signal*

180 Using bioinformatics tools, a phylogenetic signal study was carried out in order to identify the  
181 most informative SARS-CoV-2 genomic regions. The likelihood mapping analysis showed that  
182 most genes has very poor phylogenetic signal with high values in central region which  
183 represents the area of unresolved quartets (Figure 1). Accordingly, genes could be separated  
184 into three groups. A group with little or no phylogenetic signal (E, Orf6, Orf8, nsp1, and nsp14),  
185 a second group with low phylogenetic signal (Orf3a and N), and a last group with relatively  
186 more phylogenetic signal (S and nsp3) but still low to be considered a robust one (unresolved  
187 quartets >40%).

188

189 *3.2 Analysis of amino acid substitutions*

190 The analysis of amino acids substitutions by fortnights was useful to study the viral  
191 evolutionary dynamics in the context of the beginning of the pandemic. By analyzing different  
192 time periods amino acid sequences, changes were observed in 5 out of 9 regions and only in  
193 14 out of the 4975 (0.28%) evaluated residues. In most of the regions, except nsp1, nsp14, E,  
194 and Orf6, 2 to 6 amino acids were selected since FN3 and remain unchanged until the end of  
195 the follow up period (Table 2). Particularly, in Orf8 region, early selection of two amino acid  
196 substitutions (V62L and S84L) was observed from FN2. On the other hand, in the S region,  
197 the D614G substitution started with less than 2% in FN3 and FN4 and reached 88% in the last  
198 fortnight. In a similar way, the Q57H (Orf3a) substitution went from 6% to 34% while S84L  
199 start to be selected in FN2 and reached 94% by FN8. The R203K and G204R substitutions of  
200 the N region was selected in FN4 and increased their population proportion with values greater  
201 than 20% towards the end of the follow up period. Moreover, selection of a great number of  
202 sporadic substitutions remaining in the population for a short period (1-3 fortnights) was

203 observed in the nine analyzed regions. Indeed, 333 (6.83%) of the analyzed positions  
204 presented at least one substitution throughout the eight fortnights. Table 3 summarizes the  
205 number of variable positions, number of mutations, and number of sequences with mutations  
206 by region.

207

### 208 *3.3 Bayesian coalescence analysis*

209 In this study, trees were performed by Bayesian analysis instead of by distance, likelihood, or  
210 parsimony methods. Consistently with the phylogenetic signal analysis, trees for nsp1, E, and  
211 Orf6 showed a star-like topology. Nevertheless, different proportions of clades formation could  
212 be observed in trees of Orf8, nsp14, Orf3a, N, S, and nsp3 regions (Figure 2). Finally, from  
213 mentioned regions, nsp3 and S showed a better clade constitution. This analysis allowed to  
214 differentiate regions presenting a diversification process (nsp3, nsp14, Orf3a, S, Orf8, and N)  
215 from those that even after four months showed an incipient one (nsp1, E, and Orf6).  
216 Furthermore, this nucleotide analysis is complemented by the previous study of amino acid  
217 variations in each region. However, it is important to note that due to the low phylogenetic  
218 signal observed for each region, results can only be considered as preliminary.

219

### 220 *3.4 Evolutionary rate*

221 Nsp3 and S sequences were selected to perform the evolutionary rate analysis since both  
222 regions provided the best phylogenetic information among studied regions. The observed  
223 evolutionary rate for nsp3 protein of SARS-CoV-2 was estimated to be  $1.37 \times 10^{-3}$  (ESS 782)  
224 nucleotide substitutions per site per year (s/s/y) (95% HPD interval  $9.16 \times 10^{-4}$  to  $1.91 \times 10^{-3}$ ).  
225 On the other hand, the corresponding figures for S were estimated to be  $2.19 \times 10^{-3}$  (ESS 383)  
226 nucleotide s/s/y (95% HPD interval  $3.19 \times 10^{-3}$  to  $1.29 \times 10^{-3}$ ). In both genomic regions, date-  
227 randomization analyses showed no overlapping between the 95% HPD substitution-rate

228 intervals obtained from real data and from date-randomized datasets. This fact suggests that  
229 the original dataset has enough temporal signal to perform analyses with temporal calibration  
230 based on tip-dates (Figure 3).

231 **4. Discussion**

232 The phylogenetic characterization of an emerging virus is crucial to understand the way the  
233 virus and the pandemic will evolve. Thereby, a detailed study of the SARS CoV-2 genome  
234 allows, on the one hand, to contribute to the knowledge of viral diversity in order to detect the  
235 most suitable regions to be used as antivirals or vaccines targets. On the other hand, the large  
236 amount of information that is continuously generated, is allowing studying the SARS CoV-2  
237 genome and describing a new viral real time evolution like never before.

238 In the present study, the molecular evolution and viral lineages of SARS-CoV-2 in nine  
239 genomic regions, during eight successive fortnights, was analyzed using three different  
240 approaches: phylogenetic signal assessment, emergence of amino acid substitutions, and  
241 Bayesian evolutionary rate estimation. In this context, the observed phylogenetic signals of  
242 nine coding regions were very low and the obtained trees were consistent with this finding,  
243 showing star-like topologies in some viral regions (nsp1, E, and Orf6). However, after a four  
244 months evolution period, it was possible to identify regions (nsp3, S, Orf3a, Orf8, and N)  
245 revealing an incipient formation of viral lineages, despite the phylogenetic signal, both at the  
246 nucleotide and amino acid levels from FN3. Based on these findings, the SARS-CoV-2  
247 evolutionary rate was estimated, for the first time, for the two regions showing higher variability  
248 (S and nsp3).

249 As regards the phylogenetic signal, several simulation studies has proven that for a set of  
250 sequences to be considered robust, the central and lateral areas representing the unresolved  
251 quartets, must not be greater than 40% (Strimmer & von Haeseler, 1997). In this regard, none  
252 of the nine analyzed regions met this requirement. Three regions (E, nsp1, and Orf6)  
253 presented values of 100% unresolved quartets. Most regions (nsp14, Orf3a, Orf8, and N)  
254 reached values higher than 85%. Only in regions nsp3 and S the number of unresolved  
255 quartets dropped to ~ 60%. Thus, despite being a virus with an RNA genome, the short time

256 elapsed since its emergence, and possibly genetic restrictions have led to a constrained  
257 evolution of SARS-CoV-2 in these months. For this reason, it is expected that trees generated  
258 from SARS-CoV-2 partial sequences in the first months of the pandemic are unreliable for  
259 defining clades. Therefore, they should be analyzed with great caution.

260 Since Bayesian analysis allows to infer phylogenetic patterns from tree distributions, it  
261 represents a more reliable tool to compare different evolutionary behaviors. Bayesian analysis  
262 helps to obtain a tree topology that is closer to reality in the current conditions of SARS-CoV-  
263 2 pandemic (Drummond et al. 2006). The phylogenetic analysis for nsp1, E, and Orf6 regions  
264 confirmed the star-like topologies in accordance to a lower diversification of these regions  
265 using the sequences available up to FN8 (Figure 2). Trees generated from nsp14 and Orf8  
266 are at an intermediate point, where the formation of small clusters can be observed. In fact, a  
267 mutation at position 28,144 (Orf8: C251T, S84L) has been proposed as a possible marker for  
268 viral classification (Tang et al. 2020, Yin, 2020). Finally, trees obtained from regions Orf3a, N,  
269 nsp3, and S showed the best clade formation. Indeed, in the most variable regions nsp3 and  
270 S, it can be clearly seen that sequences are separated into two large groups. Despite the  
271 aforementioned for the nsp3 and S regions, even clusters with very high support values should  
272 be taken with precaution and longer periods should be considered to obtain more accurate  
273 phylogeny data. However, even when data are not the most accurate to study the spread or  
274 clade formation (Mavian et al. 2020, Sanchez-Pacheco et al. 2020), they provide a good  
275 representation of the way the virus is evolving.

276 The analysis of amino acids frequencies allowed identifying different degree of region  
277 conservation throughout the viral genome as a consequence of positive and negative  
278 pressures. In particular, nsp3, S, Orf8, and N showed some substitutions in high frequencies.  
279 This would indicate, as other authors previously report, the frequent circulation of  
280 polymorphisms due to significant positive pressure (Cagliani et al. 2020, Issa et al. 2020, Tang

281 et al. 2020). Additionally, since S and N are among candidates to be used in the formulation  
282 of vaccines and antibody treatment, it will be important to monitor these substitutions in  
283 different geographic regions in order to improve treatment and vaccination efficacy (Ahmed et  
284 al. 2020, Callaway, 2020, Koyama et al. 2020). Contrarily, in regions nsp1, nsp14, E, and Orf6,  
285 no substitutions were selected and lasted during the first 4 months of the pandemic. This would  
286 suggest that these are regions with constraints to change due to the great negative selection  
287 pressure, as it has been recently reported (Cagliani et al. 2020).

288 In the present study, the evolutionary rate for SARS-CoV-2 genes was estimated by analyzing  
289 a large number of sequences, which were carefully curated and had a good temporal and  
290 spatial structure. Additionally, the most phylogenetically informative regions of the genome  
291 (nsp3 and S) were used for analysis, reinforcing the results confidence. Previous studies on  
292 SARS-CoV-2 have reported similar data ranging from  $1.79 \times 10^{-3}$  to  $6.58 \times 10^{-3}$  s/s/y for the  
293 complete genome (Giovanetti et al. 2020, Li et al. 2020a). However, in both articles, small  
294 datasets of complete genomes were used (N=32 and 54, respectively). As studies were  
295 performed early in the outbreak and due to datasets temporal structure, analysis could have  
296 led to less precise estimates of the evolutionary rate (Duchene et al. 2020). On the other hand,  
297 another study analyzing 7,666 sequences has obtained different results with a remarkably low  
298 evolutionary rate ( $6 \times 10^{-4}$  nucleotide/genome/year) (van Dorp et al. 2020). Additionally, tests  
299 randomizing the dates of nsp3 and S datasets were carried out; they showed that these partial  
300 genomic regions have enough temporal signal. In this context, our results (range from 1.37 to  
301  $2.19 \times 10^{-3}$  s/s/y) are in close agreement with those published for SARS-CoV genome, which  
302 have been estimated between 0.80 to  $3.01 \times 10^{-3}$  s/s/y (The Chinese SARS Molecular  
303 Epidemiology Consortium, 2004, Vega et al. 2004, Zhao et al. 2004). Moreover, our values  
304 are in the same magnitude order as other RNA viruses (Sanjuán, 2012). Even though we

305 should be cautious with these results interpretation, the date-randomization analysis indicated  
306 a robust temporal signal.

307 Despite limitations of the evolutionary study of an emerging virus, where the selection  
308 pressures are still low and therefore its variability is also low, this work has a great strength: it  
309 lies on the extremely careful selection of a big sequence dataset to be analyze. First, it was  
310 considered selected sequences to have a good temporal signal and spatial (geographic)  
311 structure. Secondly, much attention was paid to the elimination of sequences with low  
312 coverage and indeterminacies that could generate a noise for the phylogenetic analysis of a  
313 virus that is beginning to evolve in a new host.

314 The appearance of a new virus means an adaptation challenge. The SARS-CoV-2 overcome  
315 the spill stage and shows a significantly higher spread than SARS-CoV and MERS-CoV, thus  
316 becoming itself the most important pandemic of the century. In this context, the results  
317 obtained in this work about the variable diversity of nine crucial viral regions and the  
318 determination of the evolutionary rate, are consequently decisive to understanding essential  
319 feature of viral emergence. Nevertheless, monitoring SARS-CoV-2 population will be required  
320 to determine the evolutionary course of new mutations as well as to understand the way they  
321 affect viral fitness in human hosts.

322

323

324

325

326

327

328

329

330 **5. Acknowledgements**

331 MJP, LM, DMF, and FAD are members of the National Research Council (CONICET). We  
332 would like to thank to the researchers who generated and shared the sequencing data from  
333 GISAID (<https://www.gisaid.org/>) and Mrs. Silvina Heisecke from CEMIC-CONICET for  
334 providing language assistance.

335



336 **6. REFERENCES**

- 337 [1] Ahmed S.F., Quadeer A.A. & McKay M.R (2020). Preliminary Identification of Potential  
338 Vaccine Targets for the COVID-19 Coronavirus (SARS-CoV-2) Based on SARS-CoV  
339 Immunological Studies. *Viruses*, 12, 254. <https://doi.org/10.3390/v12030254>
- 340 [2] Benvenuto D., Giovanetti M., Salemi M., Prosperi M., De Flora C., Junior Alcantara L.C.,  
341 et al (2020). The global spread of 2019-nCoV: a molecular evolutionary analysis. *Pathogens*  
342 *and Global Health*, 114, 64-67. <https://doi.org/10.1080/20477724.2020.1725339>
- 343 [3] Cagliani R., Forni D., Clerici M. & Sironi M (2020). Computational inference of selection  
344 underlying the evolution of the novel coronavirus, SARS-CoV-2. *Journal of Virology*, [Preprint].  
345 <https://doi.org/10.1128/JVI.00411-20>
- 346 [4] Callaway E (2020). The race for coronavirus vaccines: a graphical guide. *Nature*, 580, 576-  
347 577. <https://doi.org/10.1038/d41586-020-01221-y>
- 348 [5] Cavanagh D. Coronavirus avian infectious bronchitis virus (2007). *Veterinary Research*,  
349 38, 281-297. <https://doi.org/10.1051/vetres:2006055>
- 350 [6] Coronaviridae Study Group of the International Committee on Taxonomy of Viruses (2020).  
351 The species *Severe acute respiratory syndrome-related coronavirus*: classifying 2019-nCoV  
352 and naming it SARS-CoV-2. *Nature Microbiology*, 5, 536-544. [https://doi.org/10.1038/s41564-](https://doi.org/10.1038/s41564-020-0695-z)  
353 [020-0695-z](https://doi.org/10.1038/s41564-020-0695-z)
- 354 [7] Cui J., Li F. & Shi Z.L. (2019). Origin and evolution of pathogenic coronaviruses. *Nature*  
355 *Reviews Microbiology*, 17, 181-192. <https://doi.org/10.1038/s41579-018-0118-9>
- 356 [8] Darriba D., Taboada G.L., Doallo R. & Posada D (2012). jModelTest 2: more models, new  
357 heuristics and parallel computing. *Nature Methods*, 9, 772. <https://doi.org/10.1038/nmeth.2109>
- 358 [9] Drummond A.J., Ho S.Y., Phillips M.J. & Rambaut A (2006). Relaxed phylogenetics and  
359 dating with confidence. *PLoS Biology*, 4, e88. <https://doi.org/10.1371/journal.pbio.0040088>

- 360 [10] Duchene S., Featherstone L., Haritopoulou-Sinanidou M., Rambaut A., Lemey P., & Baele  
361 G (2020). Temporal signal and the phylodynamic threshold of SARS-CoV-2. *bioRxiv*,  
362 [Preprint]. <https://doi.org/10.1101/2020.05.04.077735>
- 363 [12] Giovanetti M., Benvenuto D., Angeletti S. & Ciccozzi M (2020). The first two cases of  
364 2019-nCoV in Italy: Where they come from? *Journal of Medical Virology*, 92, 518-521.  
365 <https://doi.org/10.1002/jmv.25699>
- 366 [13] Grassly NC & Fraser C. (2008). Mathematical models of infectious disease transmission.  
367 *Nat Rev Microbiol.* 6, 477-487. <https://doi.org/10.1038/nrmicro1845>
- 368 [14] Ismail M.M., Tang A.Y. & Saif Y.M. (2003). Pathogenicity of turkey coronavirus in turkeys  
369 and chickens. *Avian Diseases*, 47, 515-522. <https://doi.org/10.1637/5917>
- 370 [15] Issa E., Merhi G., Panossian B., Salloum T. & Tokajian S (2020). S.SARS-CoV-2 and  
371 ORF3a: Nonsynonymous Mutations, Functional Domains, and Viral Pathogenesis. *mSystems*,  
372 [Preprint]. <https://doi.org/10.1128/mSystems.00266-20>
- 373 [16] Koyama T., Weeraratne D., Snowdon J.L. & Parida L (2020). Emergence of Drift Variants  
374 That May Affect COVID-19 Vaccine Development and Antibody Treatment.  
375 *Pathogens*, 9, 324. <https://doi.org/10.20944/preprints202004.0024.v1>
- 376 [17] Li X., Wang W., Zhao X., Zai J., Zhao Q., Li Y., et al (2020a). Transmission dynamics and  
377 evolutionary history of 2019-nCoV. *Journal of Medical Virology*, 92, 501-511.  
378 <https://doi.org/10.1002/jmv.25701>
- 379 [18] Li Q., Guan X., Wu P., Wang X., Zhou L., Tong Y., et al (2020b). Early Transmission  
380 Dynamics in Wuhan, China, of Novel Coronavirus-Infected Pneumonia. *The New England*  
381 *Journal of Medicine*, 382, 1199-1207. <https://doi.org/10.1056/NEJMoa2001316>.
- 382 [19] Luk H.K.H., Li X., Fung J., Lau S.K.P. & Woo P.C.Y (2019). Molecular epidemiology,  
383 evolution and phylogeny of SARS coronavirus. *Infection Genetics and Evolution*, 71, 21-30.  
384 <https://doi.org/10.1016/j.meegid.2019.03.001>

- 385 [20] Mavian C., Marini S., Prosperi M. & Salemi M (2020). A snapshot of SARS-CoV-2 genome  
386 availability up to 30th March, 2020 and its implications. *bioRxiv*, [Preprint].  
387 <https://doi.org/10.1101/2020.04.01.020594>
- 388 [21] Miller M.A., Pfeiffer W. & Schwartz T (2010). Creating the CIPRES Science Gateway for  
389 inference of large phylogenetic trees. *Gateway Computing Environments Workshop*, 1-8.  
390 <https://doi.org/10.1109/GCE.2010.5676129>
- 391 [22] Phan T. (2020). Genetic diversity and evolution of SARS-CoV-2. *Infection Genetics and*  
392 *Evolution*, 81, 104260. <https://doi.org/10.1016/j.meegid.2020.104260>
- 393 [23] Rambaut A., Drummond A.J., Xie D., Baele G. & Suchard M.A. (2018). Posterior  
394 summarization in Bayesian phylogenetics using Tracer 1.7. *Systematic Biology*, 67, 901-904.  
395 <https://doi.org/10.1093/sysbio/syy032>
- 396 [24] Rieux A. & Khatchikian C.E. (2017). tipdatingbeast: an r package to assist the  
397 implementation of phylogenetic tip-dating tests using beast. *Molecular Ecology Resources*,  
398 17, 608-613. <https://doi.org/10.1111/1755-0998.12603>
- 399 [25] Ronquist F., Teslenko M., van der Mark P., Ayres D.L., Darling A., Höhna S., et al. (2012).  
400 MrBayes 3.2: efficient Bayesian phylogenetic inference and model choice across a large  
401 model space. *Systematic Biology*, 61, 539-542. <https://doi.org/10.1093/sysbio/sys029>
- 402 [26] Sánchez-Pacheco S.J., Kong S., Pulido-Santacruz P., Murphy R.W. & Kubatko L. (2020).  
403 Median-joining network analysis of SARS-CoV-2 genomes is neither phylogenetic nor  
404 evolutionary. *Proceedings of the National Academy of Sciences of the USA*, 117, 9241–9243.  
405 <https://doi.org/10.1073/pnas.2007062117>
- 406 [27] Sanjuán R (2012). From molecular genetics to phylodynamics: evolutionary relevance of  
407 mutation rates across viruses. *PLoS Pathogens*, 8, e1002685. [https://doi.org/](https://doi.org/10.1371/journal.ppat.1002685)  
408 [10.1371/journal.ppat.1002685](https://doi.org/10.1371/journal.ppat.1002685)

- 409 [28] Schmidt H.A., Strimmer K., Vingron M. & Von Haeseler A (2002). TREE-PUZZLE:  
410 Maximum likelihood phylogenetic analysis using quartets and parallel computing.  
411 *Bioinformatics*, 18, 502-504. <https://doi.org/10.1093/bioinformatics/18.3.502>
- 412 [29] Strimmer K. & von Haeseler A (1997). Likelihood-mapping: A simple method to visualize  
413 phylogenetic content of a sequence alignment. *Proceedings of the National Academy of*  
414 *Sciences of the USA*, 94, 6815-6819. <https://doi.org/10.1073/pnas.94.13.6815>
- 415 [30] Su S., Wong G., Shi W., Liu J., Lai A.C.K., Zhou J., et al (2016). Epidemiology, genetic  
416 recombination, and pathogenesis of coronaviruses. *Trends in Microbiology*, 24, 490-502.  
417 <https://doi.org/10.1016/j.tim.2016.03.003>
- 418 [31] Suchard M.A., Lemey P., Baele G., Ayres D.L., Drummond A.J. & Rambaut A (2018).  
419 Bayesian phylogenetic and phylodynamic data integration using BEAST 1.10. *Virus Evolution*,  
420 4, vey016. <https://doi.org/10.1093/ve/vey016>
- 421 [32] Tang X., Wu C., Li X., Song Y., Yao X., Wu X., et al (2020). On the origin and continuing  
422 evolution of SARS-CoV-2. *National Science Review*, 0, 1-12.  
423 <https://doi.org/10.1093/nsr/nwaa036>
- 424 [33] The Chinese SARS Molecular Epidemiology Consortium (2004). Molecular Evolution of  
425 the SARS Coronavirus During the Course of the SARS Epidemic in China. *Science*, 303,  
426 1666-1669. <https://doi.org/10.1126/science.1092002>
- 427 [34] van Dorp L., Acman M., Richard D., Shaw L.P., Ford C.E., Ormond L., et al (2020).  
428 Emergence of genomic diversity and recurrent mutations in SARS-CoV-2. *Infection Genetics*  
429 *and Evolution*, 5, 104351. <https://doi.org/10.1016/j.meegid.2020.104351>
- 430 [35] Vega V.B., Ruan Y., Liu J., Lee W.H., Wei C.L., Se-Thoe S.Y., et al (2004). Mutational  
431 dynamics of the SARS coronavirus in cell culture and human populations isolated in 2003.  
432 *BMC Infectious Diseases*, 4, 32. <https://doi.org/10.1186/1471-2334-4-32>

- 433 [36] World Health Organization, 2020. Coronavirus disease (COVID-19) Situation Report – 118.  
434 Retrieved from: [https://www.who.int/docs/default-source/coronaviruse/situation-](https://www.who.int/docs/default-source/coronaviruse/situation-reports/20200517-covid-19-sitrep-118.pdf?sfvrsn=21c0d4fe_6)  
435 [reports/20200517-covid-19-sitrep-118.pdf?sfvrsn=21c0d4fe\\_6](https://www.who.int/docs/default-source/coronaviruse/situation-reports/20200517-covid-19-sitrep-118.pdf?sfvrsn=21c0d4fe_6) (17 July 2020, date last  
436 accessed).
- 437 [37] Yin C (2020). Genotyping coronavirus SARS-CoV-2: methods and implications.  
438 *Genomics*, 30318-30319, [Preprint]. <https://doi.org/10.1016/j.ygeno.2020.04.016>
- 439 [38] Zhao Z., Li H., Wu X., Zhong Y., Zhang K., Zhang Y.P., et al (2004). Moderate mutation  
440 rate in the SARS coronavirus genome and its implications. *BMC Evolutionary Biology*, 4, 21.  
441 <https://doi.org/10.1186/1471-2148-4-21>
- 442 [39] Zhou P., Yang X.L., Wang X.G., Hu B., Zhang L., Zhang W. et al (2020). A pneumonia  
443 outbreak associated with a new coronavirus of probable bat origin. *Nature*, 579, 270-273.  
444 <https://doi.org/10.1038/s41586-020-2012-7>
- 445 [40] Zhu N., Zhang D., Wang W., Li X., Yang B., Song J., et al. (2020). A Novel Coronavirus  
446 from Patients with Pneumonia in China, 2019. *The New England Journal of Medicine*, 382,  
447 727-733. <https://doi.org/10.1056/NEJMoa2001017>
- 448
- 449
- 450
- 451
- 452
- 453
- 454
- 455
- 456
- 457

458 **Table 1.** Number of SARS-CoV-2 sequences by fortnight (Temporal structure)

| <b>Fortnight</b> | <b>Date</b>                 | <b>Median of analyzed sequences (Q1-Q3)</b> |
|------------------|-----------------------------|---------------------------------------------|
| FN1              | 12/24/2019 to<br>12/31/2019 | 15                                          |
| FN2              | 01/01/2020 to<br>01/15/2020 | 19                                          |
| FN3              | 01/16/2020 to<br>01/31/2020 | 145 (136-145.5)                             |
| FN4              | 02/01/2020 to<br>02/15/2020 | 119 (113-120)                               |
| FN5              | 02/16/2020 to<br>03/02/2020 | 258 (247-259)                               |
| FN6              | 03/03/2020 to<br>03/17/2020 | 403 (390-406)                               |
| FN7              | 03/18/2020 to<br>04/01/2020 | 447 (416-450)                               |
| FN8              | 04/02/2020 to<br>04/17/2020 | 199 (197-201)                               |
| <b>TOTAL</b>     |                             | <b>1488 to 1616</b>                         |

459 FN: Fortnight; Q1=quartile 1, Q3=quartile 3. The total number of sequences is variable depending on  
460 the analyzed region (nsp1, 1608; nsp3, 1511; nsp14, 1550; S, 1488; Orf3a, 1600; E, 1615; Orf6, 1616;  
461 Orf8, 1612; and N, 1610)  
462

463 **Table 2.** Amino acids selected by region and fortnight. The number indicates the amino acids  
 464 location in its protein.

| Region | Amino acid substitution | Amino acid percentage by FN |      |      |      |      |      |      |      |
|--------|-------------------------|-----------------------------|------|------|------|------|------|------|------|
|        |                         | FN1                         | FN2  | FN3  | FN4  | FN5  | FN6  | FN7  | FN8  |
| nsp3   | A58T                    | 0                           | 0    | 0    | 1.0  | 6.0  | 3.0  | 3.0  | 2.5  |
|        | P135L                   | 0                           | 0    | 0.8  | 0    | 0    | 1.5  | 0.5  | 2.5  |
| S      | D614G                   | 0                           | 0    | 1.5  | 1.8  | 37.0 | 64.0 | 75.0 | 88.0 |
| Orf3a  | Q75H                    | 0                           | 0    | 0    | 0    | 6.0  | 22.0 | 23.0 | 34.0 |
|        | G196V                   | 0                           | 0    | 0    | 0    | 0.8  | 4.0  | 0.9  | 0.5  |
|        | G251V                   | 0                           | 0    | 8.0  | 24.0 | 8.0  | 9.0  | 10.0 | 3.0  |
| Orf8   | V62L                    | 0                           | 5.0  | 1.0  | 3.3  | 0.0  | 1.5  | 1.3  | 3.0  |
|        | S84L                    | 0                           | 58.0 | 63.0 | 79.0 | 79.0 | 82.0 | 93.0 | 94.0 |
| N      | P13L                    | 0                           | 0    | 0    | 0    | 1.0  | 1.0  | 2.5  | 0.5  |
|        | S197L                   | 0                           | 0    | 0    | 0    | 1.1  | 5.0  | 0.9  | 0.5  |
|        | S202N                   | 0                           | 0    | 3.5  | 4.2  | 0    | 0.5  | 2.2  | 2.5  |
|        | R203K                   | 0                           | 0    | 0    | 0    | 17.0 | 19.0 | 24.0 | 23.0 |
|        | G204R                   | 0                           | 0    | 0    | 0    | 17.0 | 19.0 | 24.0 | 23.0 |
|        | I292T                   | 0                           | 0    | 0    | 0    | 2.0  | 0.2  | 0.2  | 0.5  |

465 Only regions where amino acid change was selected and remained until the last analyzed fortnight are  
 466 shown. FN: Fortnight; aa: amino acid  
 467  
 468

469 **Table 3.** Number of variable positions, number of mutations, and number of sequences with  
470 mutation by region

| <b>Region</b>  | <b>N° of variable aa positions (%)</b> | <b>N° of aa substitutions</b> | <b>N° of sequences with aa substitutions (%)</b> |
|----------------|----------------------------------------|-------------------------------|--------------------------------------------------|
| nsp1 (180aa)   | 3 (1.7)                                | 37                            | 37 (2.4)                                         |
| nsp3 (1945aa)  | 158 (8.1)                              | 322                           | 294 (19.3)                                       |
| nsp14 (527aa)  | 6 (1.4)                                | 83                            | 83 (5.5)                                         |
| S (1273aa)     | 76 (5.9)                               | 1013                          | 904 (59.4)                                       |
| Orf3a (275aa)  | 11 (4)                                 | 491                           | 468 (30.7)                                       |
| E (75aa)       | 5 (6.7)                                | 6                             | 6 (0.4)                                          |
| Orf6 (60aa)    | 7 (11.6)                               | 9                             | 9 (0.6)                                          |
| Orf8 (121aa)   | 14 (11.6)                              | 312                           | 288 (18.9)                                       |
| N (419aa)      | 53 (12.6)                              | 760                           | 470 (30.9)                                       |
| Total (4875aa) | 333 (6.8)                              | 3033                          | -                                                |

471 aa: amino acid

472

473

474

475

476

477

478

479

480

481

482

483



484 **Figure legends**

485

486 **Figure 1:** Phylogenetic signal for SARS-CoV-2 datasets. Presence of phylogenetic signal was  
487 evaluated by likelihood mapping, unresolved quartets (center) and partly resolved quartets  
488 (edges) for genomes available on April 17 for the nine analyzed regions: nsp1 (29 sequences),  
489 nsp3 (225 sequences), nsp14 (65 sequences), S (183 sequences), Orf3a (74 sequences), E  
490 (11 sequences), Orf6 (12 sequences), Orf8 (23 sequences), and N (113 sequences).  
491 Presence of strong phylogenetic signal (<40% unresolved quartets) was not reached for any  
492 region.

493

494 **Figure 2:** Bayesian trees of 29 sequences of nsp1 (540nt), 225 sequences of nsp3 (5835nt),  
495 65 sequences of nsp14 (1581nt), 183 sequences of S (3822nt), 74 sequences of Orf3a  
496 (828nt), 11 sequences of E (228nt), 12 sequences of Orf6 (186nt), 23 sequences of Orf8  
497 (366nt), and 113 sequences of N (1260nt). Scale bar represents substitutions per site.

498

499 **Figure 3:** Comparison of the evolutionary rates estimated using BEAST for the original dataset  
500 and the date-randomized datasets (312 sequences). This analysis was performed for regions  
501 nsp3 (5835nt) and S (3822nt). s.s.y = substitutions/site/year.

502

503

504

505

506

507

508

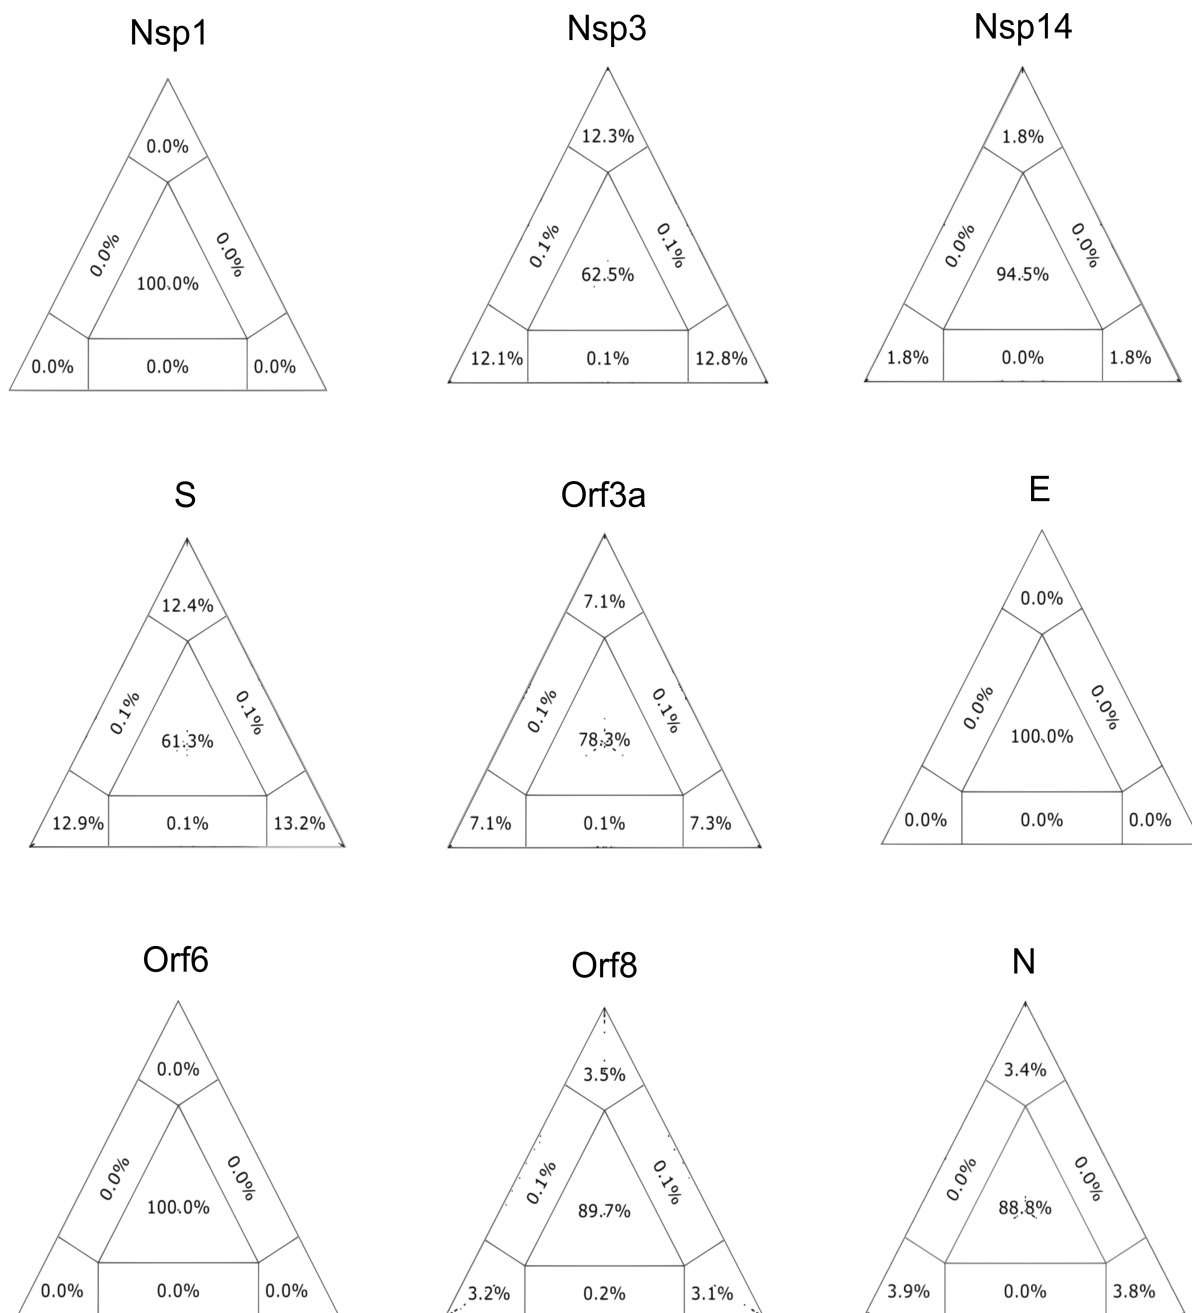

Figure 1

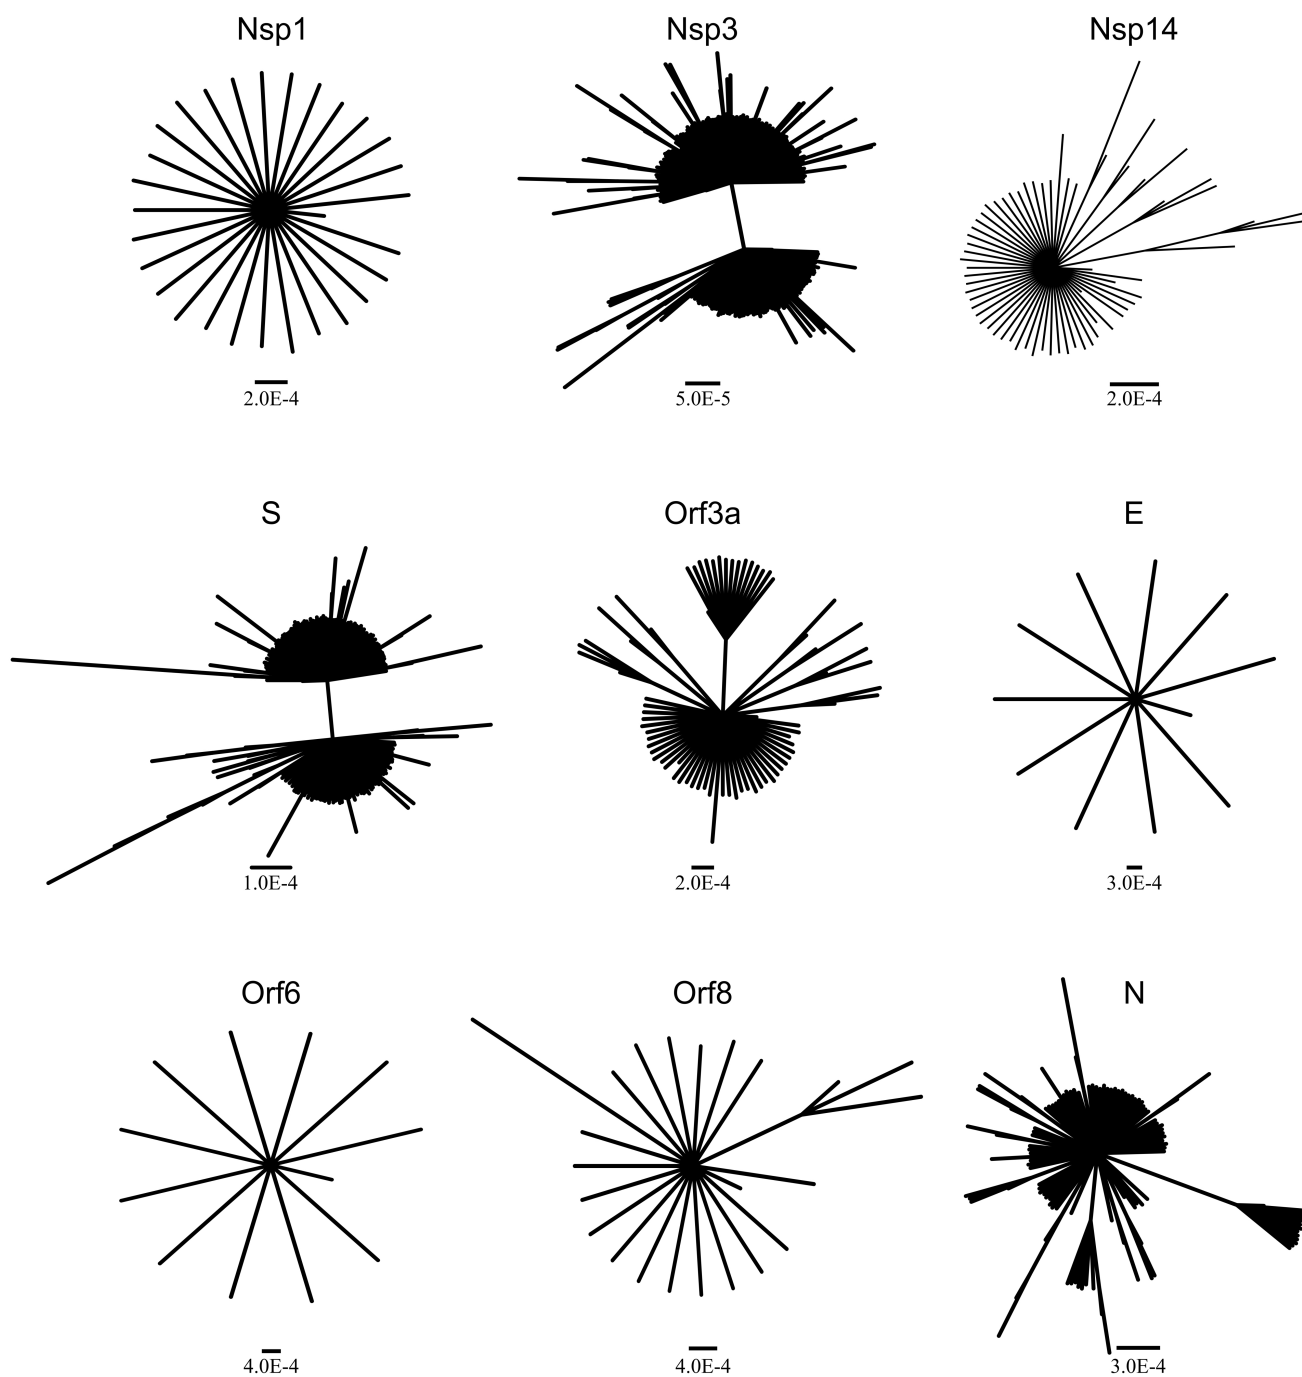

Figure 2

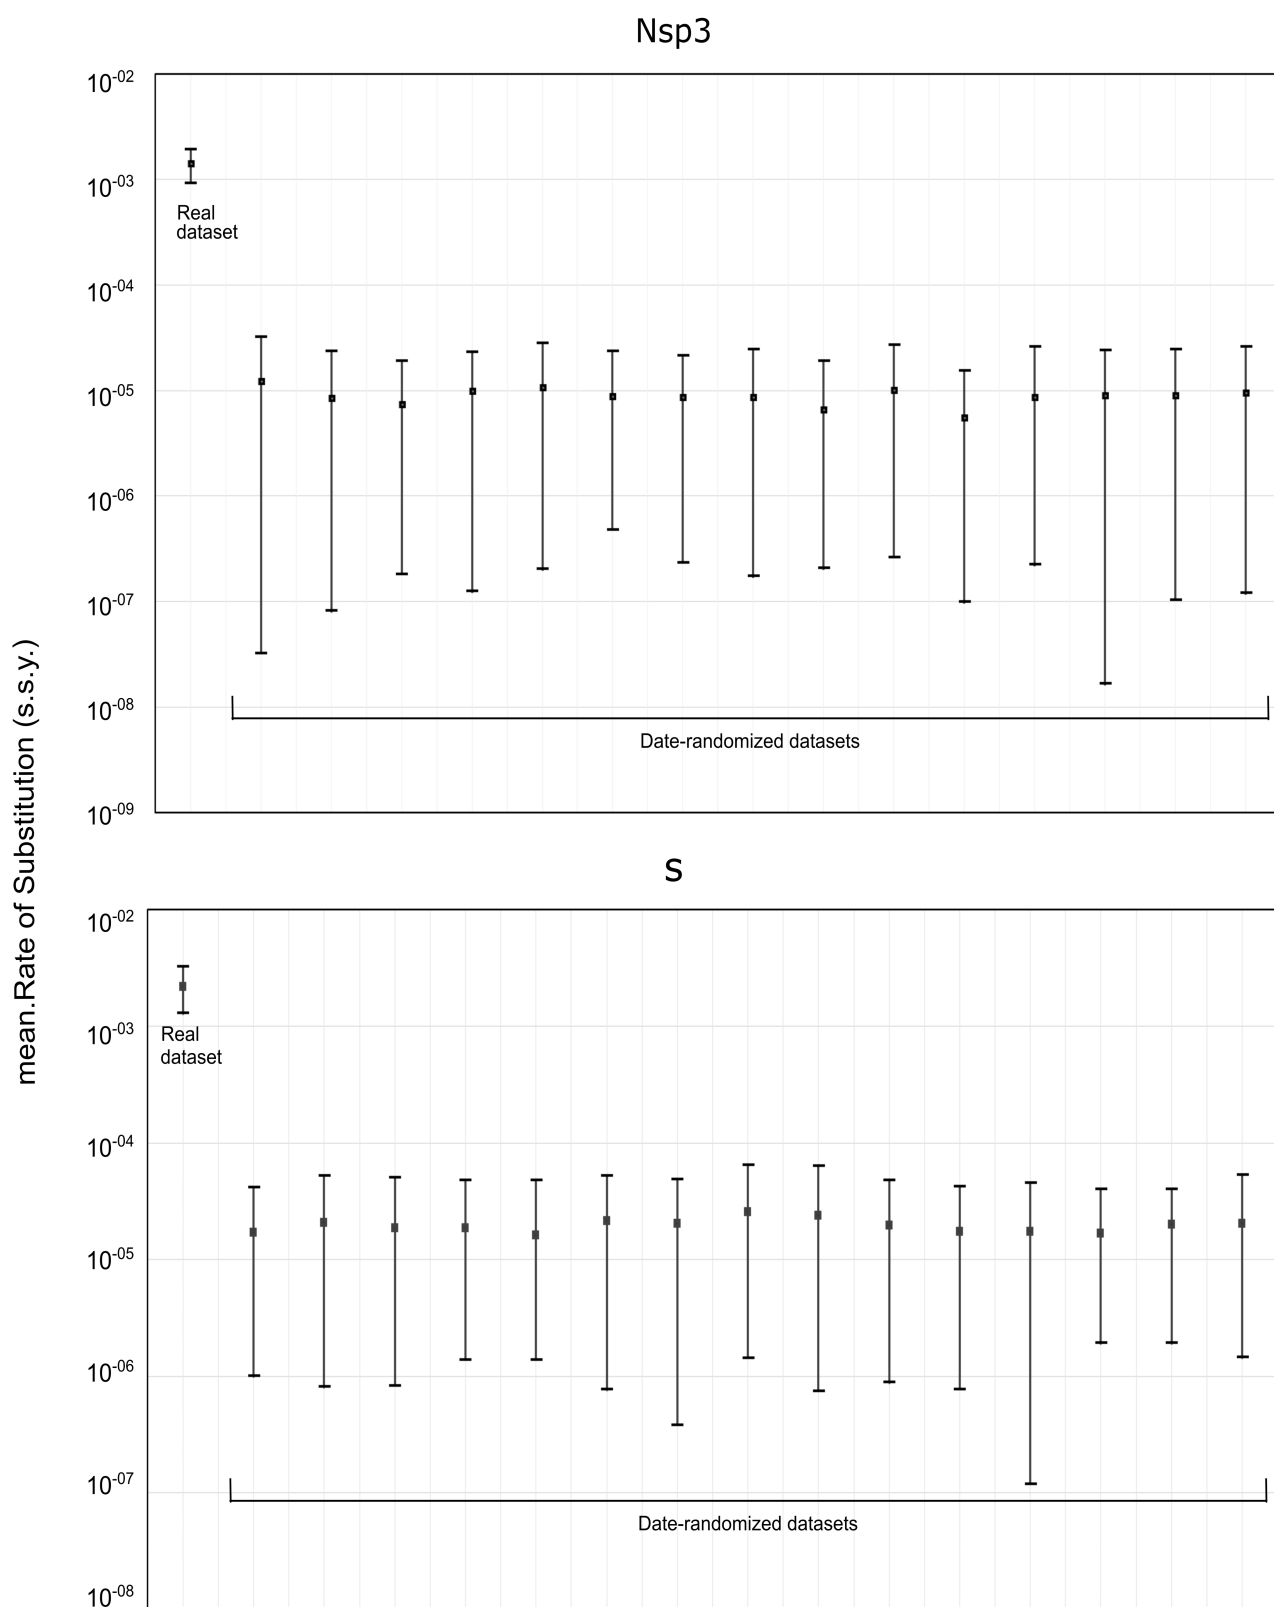

Figure 3
